# Supplementary material for: Maternal Diet, Infection, and Risk of Cord Blood Inflammation in the Bangladesh Projahnmo Pregnancy Cohort
Source: MDPI journal article supplement (doi:10.3390/nu13113792), 2021-10-26
Supplement: s1 [file s1]

## Supplementary Material

**Table S1.** Data collection timepoints

| Measurement/Questionnaire               | Antenatal Care Visits |           |           |           | Birth |
|-----------------------------------------|-----------------------|-----------|-----------|-----------|-------|
|                                         | Enrollment            | 24-28 wks | 32-36 wks | 38-40 wks |       |
| Medical and obstetric history and risks | x                     |           |           |           |       |
| Household sociodemographic              | x                     |           |           |           |       |
| Maternal anthropometrics & morbidity    | x                     | x         | x         | x         |       |
| Food Frequency Questionnaire            |                       | x         | x         | x         |       |
| Delivery outcomes                       |                       |           |           |           | x     |
| Umbilical cord blood collection         |                       |           |           |           | x     |
| Newborn anthropometrics & morbidity     |                       |           |           |           | x     |

**Table S2.** Frequency of intake of each of n = 39 FFQ items by time period of assessment

| FFQ Food Item        | Mean Frequency 24-<br>28 wks (n=250) | Mean Frequency 32-<br>36 wks (n=246) | Comparison between mean intake frequency at<br>two time points (T1 V T2): Paired T-Test, n =<br>245 |         |         |
|----------------------|--------------------------------------|--------------------------------------|-----------------------------------------------------------------------------------------------------|---------|---------|
|                      | Mean (SD)                            | Mean (SD)                            | Mean<br>difference                                                                                  | t Value | Pr >  t |
| Any kind of red meat | 0.61 (1.33)                          | 0.52 (1.14)                          | 0.09                                                                                                | 1.14    | 0.254   |
| Any kind of poultry  | 1.00 (1.39)                          | 1.36 (1.55)                          | -0.36                                                                                               | -2.87   | 0.0044* |
| Any kind of liver    | 0.22 (0.70)                          | 0.16 (0.58)                          | 0.06                                                                                                | 1.06    | 0.2912  |
| Any kind of fish     | 5.79 (1.96)                          | 5.91 (1.87)                          | -0.12                                                                                               | -0.89   | 0.3718  |
| Egg                  | 0.82 (1.44)                          | 0.8 (1.34)                           | 0.02                                                                                                | 0.19    | 0.8482  |
| Milk                 | 0.61(1.61)                           | 0.46 (1.36)                          | 0.15                                                                                                | 1.37    | 0.1727  |
| Yoghurt/Curd         | 0.03 (0.23)                          | 0.05 (0.50)                          | -0.02                                                                                               | -0.7    | 0.4866  |
| Butter               | 0.09 (0.77)                          | 0.12 (0.89)                          | -0.03                                                                                               | -0.43   | 0.6671  |
| Peanuts              | 0.00 (0.06)                          | 0.03 (0.45)                          | -0.03                                                                                               | -0.85   | 0.3972  |
| Vegetable oil        | 6.88 (0.72)                          | 6.9 (0.71)                           | -0.02                                                                                               | 0.07    | 0.9481  |
| Carrots              | 0.03 (0.23)                          | 0.00 (0.00)                          | 0.03                                                                                                | 2.15    | 0.0322* |
| Corn                 | 0.03 (0.45)                          | 0.00 (0.00)                          | 0.03                                                                                                | 1       | 0.3183  |
| Tomatoes (red)       | 1.11(1.56)                           | 0.55 (1.16)                          | 0.56                                                                                                | 5.67    | <.0001* |
| Pumpkin (yellow)     | 0.64 (1.09)                          | 0.66 (1.09)                          | -0.02                                                                                               | -0.14   | 0.8917  |
| Dark leafy greens    | 2.9 (2.21)                           | 2.68 (2.18)                          | 0.22                                                                                                | 1.98    | 0.0491* |
| Beans / Peas         | 0.61(1.20)                           | 0.32 (0.70)                          | 0.29                                                                                                | 4.08    | <.0001* |
| Papaya (yellow)      | 0.15 (0.45)                          | 0.23 (0.69)                          | -0.08                                                                                               | -1.37   | 0.1715  |
| Jackfruit            | 0.86 (1.61)                          | 1.38 (1.90)                          | -0.52                                                                                               | -2.87   | 0.0044* |
| Mango                | 1.20 (2.20)                          | 1.76 (2.36)                          | -0.56                                                                                               | -2.39   | 0.0178* |
| Banana               | 0.37 (0.84)                          | 0.40 (0.95)                          | -0.03                                                                                               | -0.47   | 0.6417  |

|                    |             |             |       |       |         |
|--------------------|-------------|-------------|-------|-------|---------|
| Orange             | 0.18 (0.71) | 0.06 (0.36) | 0.12  | 2.49  | 0.0134* |
| Watermelon         | 0.29 (0.82) | 0.02 (0.15) | 0.27  | 4.86  | <.0001* |
| Melon (yellow)     | 0.00 (0.00) | 0.00 (0.00) | 0     | -1    | 0.3183  |
| Guava              | 0.21 (0.81) | 0.36 (1.08) | -0.15 | -1.71 | 0.0891  |
| Moringa leaves     | 0.20 (1.03) | 0.04 (0.41) | 0.16  | 2.05  | 0.041*  |
| Green pepper       | 1.94 (2.11) | 1.60 (1.87) | 0.34  | 2.12  | 0.0354* |
| Spinach or Cassava | 0.41 (1.06) | 0.65 (1.15) | -0.24 | -2.68 | 0.0078* |
| Radish leaves      | 0.01 (0.09) | 0.01 (0.11) | 0     | -0.45 | 0.6556  |
| Sweet potato       | 0.12 (0.81) | 0.00 (0.06) | 0.12  | 2.1   | 0.0364* |
| Whole milk powder  | 1.85 (2.46) | 2.01 (2.63) | -0.16 | -0.92 | 0.3581  |
| Khoa               | 0.29 (1.25) | 0.39 (1.42) | -0.1  | -0.8  | 0.4217  |
| Cherries           | 0.00 (0.00) | 0.00 (0.00) | 0     | .     | .       |
| Methi leaves       | 0.00 (0.00) | 0.00 (0.00) | 0     | .     | .       |
| Bathua leaves      | 0.02 (0.22) | 0.00 (0.00) | 0.02  | 1.74  | 0.0833  |
| Soyabean           | 0.09 (0.65) | 0.08 (0.41) | 0.01  | 0.3   | 0.7616  |
| Lentils            | 1.59 (1.54) | 1.54 (1.33) | 0.05  | 0.62  | 0.5377  |
| Bajra              | 0.01 (1.19) | 0.00 (0.00) | 0.01  | -1    | 0.3183  |
| Red palm oil       | 0.00 (0.00) | 0.00 (0.00) | 0     | .     | .       |
| Plantain           | 0.15 (0.57) | 0.10 (0.38) | 0.05  | 0.98  | 0.3291  |

**Table S3.** The adjusted odds of cord blood inflammation (>75<sup>th</sup> percentile) by tertile of maternal nutrient intake (n=251 mothers and their healthy, term infants). [Reference is the middle tertile of intake]

| Nutrient <sup>†</sup>    | Tertiles of Intake<br>(range) | IL-1α                     | IL-1β                    | IL-6                      | IL-8                      | CRP                       | Any marker <sup>2</sup>   |
|--------------------------|-------------------------------|---------------------------|--------------------------|---------------------------|---------------------------|---------------------------|---------------------------|
|                          |                               | AOR <sup>‡</sup> [95%CI]  | AOR <sup>‡</sup> [95%CI] | AOR <sup>‡</sup> [95%CI]  | AOR <sup>‡</sup> [95%CI]  | AOR <sup>‡</sup> [95%CI]  | AOR <sup>‡</sup> [95%CI]  |
| Vit A (mcg)              | <33% (32.1–286)               | 1.50 [0.7 - 3.21]         | 2.13 [0.93 - 4.87]       | 1.18 [0.56 - 2.52]        | 1.76 [0.81 - 3.79]        | 1.16 [0.56 - 2.41]        | 1.27 [0.64 - 2.51]        |
|                          | >66% (482–2741)               | 0.96 [0.44 - 2.1]         | 1.81 [0.8 - 4.1]         | 0.78 [0.36 - 1.69]        | 0.79 [0.35 - 1.78]        | 0.62 [0.29 - 1.35]        | 1.15 [0.58 - 2.28]        |
| Vit B1 (mg)              | <33% (0.09–0.22)              | 2.13 [0.98 - 4.65]        | 1.76 [0.79 - 3.95]       | 2.07 [0.95 - 4.48]        | <b>2.27 [1.05 - 4.91]</b> | 1.11 [0.52 - 2.34]        | 1.14 [0.57 - 2.27]        |
|                          | >66% (0.32–0.56)              | 1.30 [0.59 - 2.85]        | 0.75 [0.34 - 1.68]       | 1.02 [0.46 - 2.26]        | 0.74 [0.32 - 1.67]        | 1.01 [0.48 - 2.12]        | 0.91 [0.46 - 1.8]         |
| Vit B2 (mg)              | <33% (0.12–0.37)              | <b>3.17 [1.39 - 7.19]</b> | 2.11 [0.93 - 4.8]        | <b>2.25 [1.03 - 4.94]</b> | <b>2.45 [1.12 - 5.37]</b> | <b>2.52 [1.17 - 5.45]</b> | <b>2.84 [1.37 - 5.88]</b> |
|                          | >66% (0.55–1.60)              | 1.86 [0.83 - 4.15]        | 1.14 [0.52 - 2.51]       | 1.10 [0.5 - 2.41]         | 0.74 [0.33 - 1.68]        | 1.10 [0.5 - 2.42]         | 1.45 [0.74 - 2.86]        |
| Vit B3 (mg)              | <33% (3.55 – 7.34)            | <b>2.30 [1.03 - 5.12]</b> | <b>2.94 [1.25 - 6.9]</b> | 1.60 [0.74 - 3.46]        | <b>3.23 [1.42 - 7.31]</b> | 0.96 [0.46 - 2.02]        | 1.70 [0.84 - 3.44]        |
|                          | >66% (0.20–0.56)              | 1.61 [0.72 - 3.58]        | 1.70 [0.75 - 3.84]       | 0.80 [0.36 - 1.78]        | 1.32 [0.57 - 3.06]        | 0.62 [0.29 - 1.34]        | 1.04 [0.52 - 2.06]        |
| Vit B6 (mg)              | <33% (0.20–0.47)              | 1.78 [0.82 - 3.87]        | 1.92 [0.85 - 4.34]       | <b>2.47 [1.12 - 5.44]</b> | <b>2.35 [1.08 - 5.13]</b> | 1.56 [0.74 - 3.3]         | 1.43 [0.71 - 2.9]         |
|                          | >66% (0.68–1.49)              | 1.20 [0.55 - 2.61]        | 0.75 [0.34 - 1.67]       | 1.09 [0.49 - 2.44]        | 0.71 [0.31 - 1.63]        | 0.90 [0.41 - 1.95]        | 0.80 [0.4 - 1.58]         |
| Vit B9 (Folate)<br>(mcg) | <33% (9.36–77.3)              | 1.60 [0.73 - 3.51]        | 2.04 [0.88 - 4.71]       | 1.16 [0.54 - 2.47]        | <b>2.28 [1.04 - 5.02]</b> | 1.36 [0.64 - 2.89]        | 1.14 [0.57 - 2.3]         |
|                          | >66% (121–321)                | 1.28 [0.6 - 2.73]         | 1.26 [0.57 - 2.76]       | 0.55 [0.25 - 1.19]        | 0.78 [0.35 - 1.76]        | 0.86 [0.4 - 1.85]         | 0.89 [0.45 - 1.76]        |
| Vit B12 (mcg)            | <33% (0.20–1.60)              | 0.60 [0.28 - 1.3]         | 0.49 [0.21 - 1.13]       | <b>0.42 [0.19 - 0.92]</b> | 0.49 [0.23 - 1.07]        | 0.75 [0.35 - 1.6]         | 0.83 [0.41 - 1.67]        |
|                          | >66% (1.89–2.75)              | 0.63 [0.29 - 1.37]        | 0.54 [0.24 - 1.24]       | <b>0.38 [0.17 - 0.84]</b> | <b>0.42 [0.19 - 0.95]</b> | 0.71 [0.33 - 1.56]        | 0.70 [0.35 - 1.4]         |
| Vit C (mg)               | <33% (1.50–57.3)              | 1.28 [0.59 - 2.8]         | 1.28 [0.57 - 2.89]       | 1.31 [0.61 - 2.81]        | 1.23 [0.57 - 2.62]        | 0.65 [0.31 - 1.38]        | 0.89 [0.45 - 1.77]        |
|                          | >66% (101–261)                | 1.18 [0.56 - 2.48]        | 0.76 [0.35 - 1.65]       | 0.82 [0.38 - 1.74]        | 0.52 [0.24 - 1.15]        | 0.52 [0.25 - 1.1]         | 0.88 [0.45 - 1.73]        |
| Vit D (mcg)              | <33% (2.26–7.71)              | 0.66 [0.29 - 1.52]        | 1.44 [0.59 - 3.52]       | 1.33 [0.57 - 3.07]        | 1.18 [0.51 - 2.73]        | 0.90 [0.39 - 2.06]        | 0.84 [0.39 - 1.79]        |
|                          | >66% (11.6–27.13)             | <b>0.48 [0.23 - 0.99]</b> | 0.65 [0.31 - 1.37]       | 0.80 [0.39 - 1.67]        | 0.57 [0.27 - 1.2]         | 0.86 [0.42 - 1.77]        | <b>0.46 [0.23 - 0.91]</b> |

|                                                                                    |                   |                    |                           |                    |                           |                    |                           |
|------------------------------------------------------------------------------------|-------------------|--------------------|---------------------------|--------------------|---------------------------|--------------------|---------------------------|
| Vit E (mg)                                                                         | <33% (1.76–2.74)  | 0.91 [0.42 - 1.98] | 1.00 [0.43 - 2.34]        | 0.82 [0.38 - 1.79] | 1.06 [0.49 - 2.3]         | 0.90 [0.43 - 1.9]  | 0.54 [0.27 - 1.09]        |
|                                                                                    | >66% (3.45–6.01)  | 0.79 [0.38 - 1.65] | 0.76 [0.36 - 1.61]        | 0.60 [0.28 - 1.26] | <b>0.42 [0.19 - 0.92]</b> | 0.56 [0.26 - 1.19] | <b>0.44 [0.22 - 0.89]</b> |
| Iron (mg)                                                                          | <33% (1.05–2.76)  | 1.57 [0.73 - 3.38] | <b>2.37 [1.03 - 5.45]</b> | 1.52 [0.72 - 3.25] | <b>2.28 [1.05 - 4.97]</b> | 0.94 [0.45 - 1.94] | 1.06 [0.54 - 2.09]        |
|                                                                                    | >66% (4.20–7.14)  | 1.30 [0.61 - 2.78] | 1.52 [0.68 - 3.37]        | 0.96 [0.45 - 2.05] | 1.01 [0.45 - 2.24]        | 0.70 [0.34 - 1.48] | 0.75 [0.38 - 1.46]        |
| Selenium (mg)                                                                      | <33% (0.01–0.03)  | 1.43 [0.67 - 3.06] | 1.62 [0.72 - 3.66]        | 1.01 [0.48 - 2.16] | 1.79 [0.84 - 3.83]        | 0.95 [0.46 - 1.97] | 0.95 [0.48 - 1.89]        |
|                                                                                    | >66% (0.04–0.08)  | 1.23 [0.58 - 2.62] | 1.43 [0.66 - 3.1]         | 1.01 [0.48 - 2.11] | 1.02 [0.47 - 2.23]        | 0.65 [0.3 - 1.37]  | 0.66 [0.33 - 1.3]         |
| Zinc (mg)                                                                          | <33% (1.07–2.56)  | 2.10 [0.95 - 4.65] | <b>2.52 [1.07 - 5.91]</b> | 2.08 [0.93 - 4.65] | 2.20 [1 - 4.86]           | 1.60 [0.73 - 3.47] | 1.75 [0.86 - 3.58]        |
|                                                                                    | >66% (3.61–7.60)  | 1.23 [0.56 - 2.7]  | 1.26 [0.56 - 2.82]        | 1.24 [0.57 - 2.73] | 0.68 [0.3 - 1.55]         | 1.06 [0.49 - 2.28] | 0.97 [0.49 - 1.92]        |
| ALA (mg)                                                                           | <33% (20.0–143)   | 1.48 [0.67 - 3.24] | 1.58 [0.68 - 3.69]        | 1.25 [0.57 - 2.73] | 2.10 [0.95 - 4.68]        | 1.35 [0.64 - 2.87] | 1.10 [0.54 - 2.22]        |
|                                                                                    | >66% (243–575)    | 1.13 [0.54 - 2.4]  | 1.30 [0.61 - 2.77]        | 0.99 [0.47 - 2.09] | 0.94 [0.43 - 2.06]        | 0.67 [0.31 - 1.43] | 0.72 [0.37 - 1.42]        |
| DHA (mg)                                                                           | <33% (17.7–74.1)  | 0.69 [0.33 - 1.44] | 0.95 [0.44 - 2.08]        | 0.91 [0.43 - 1.93] | 1.04 [0.49 - 2.22]        | 1.26 [0.61 - 2.64] | 0.90 [0.46 - 1.75]        |
|                                                                                    | >66% (85.3–118)   | 0.77 [0.36 - 1.69] | 0.97 [0.42 - 2.23]        | 1.15 [0.53 - 2.51] | 1.27 [0.57 - 2.82]        | 1.40 [0.63 - 3.08] | 0.83 [0.41 - 1.67]        |
| DPA (mg)                                                                           | <33% (2.77–30.4)  | 0.89 [0.35 - 2.26] | 0.93 [0.35 - 2.43]        | 0.75 [0.3 - 1.89]  | 1.02 [0.39 - 2.66]        | 1.76 [0.67 - 4.6]  | 1.31 [0.57 - 2.97]        |
|                                                                                    | >66% (38.7–38.7)  | 1.32 [0.56 - 3.08] | 1.46 [0.61 - 3.52]        | 1.08 [0.47 - 2.51] | 1.46 [0.6 - 3.53]         | 1.86 [0.74 - 4.67] | 1.39 [0.64 - 2.98]        |
| ETA (mg)                                                                           | <33% (3.27–21.1)  | 0.95 [0.44 - 2.05] | 1.06 [0.47 - 2.42]        | 0.73 [0.34 - 1.58] | 1.18 [0.53 - 2.61]        | 1.47 [0.68 - 3.18] | 1.57 [0.78 - 3.16]        |
|                                                                                    | >66% (24.5–35.7)  | 1.00 [0.48 - 2.1]  | 1.16 [0.53 - 2.54]        | 0.77 [0.37 - 1.6]  | 1.35 [0.63 - 2.9]         | 1.53 [0.72 - 3.26] | 1.34 [0.69 - 2.61]        |
| EPA (mg)                                                                           | <33% (2.26–24.8)  | 0.86 [0.4 - 1.84]  | 0.74 [0.33 - 1.68]        | 0.97 [0.45 - 2.09] | 0.92 [0.42 - 1.99]        | 1.40 [0.64 - 3.02] | 1.46 [0.73 - 2.93]        |
|                                                                                    | >66% (31.6–31.6)  | 0.89 [0.42 - 1.86] | 0.79 [0.36 - 1.72]        | 0.90 [0.42 - 1.9]  | 0.89 [0.42 - 1.9]         | 1.59 [0.74 - 3.4]  | 1.17 [0.6 - 2.28]         |
| ARA (mg)                                                                           | <33% (33.2–67.1)  | 1.29 [0.6 - 2.75]  | 0.74 [0.33 - 1.63]        | 1.34 [0.64 - 2.8]  | 1.77 [0.83 - 3.81]        | 1.43 [0.68 - 3]    | 1.23 [0.62 - 2.44]        |
|                                                                                    | >66% (96.5–234.8) | 1.19 [0.55 - 2.58] | 0.64 [0.28 - 1.45]        | 0.59 [0.27 - 1.34] | 1.04 [0.46 - 2.35]        | 1.15 [0.53 - 2.49] | 0.75 [0.38 - 1.5]         |
| LA (mg)                                                                            | <33% (1020–1994)  | 1.72 [0.81 - 3.67] | 1.73 [0.76 - 3.9]         | 1.35 [0.63 - 2.9]  | <b>2.35 [1.07 - 5.15]</b> | 1.47 [0.69 - 3.12] | 1.89 [0.93 - 3.86]        |
|                                                                                    | >66% (2116–3561)  | 0.78 [0.36 - 1.69] | 1.10 [0.51 - 2.38]        | 0.85 [0.4 - 1.8]   | 0.96 [0.43 - 2.12]        | 0.87 [0.41 - 1.85] | 0.83 [0.42 - 1.64]        |
| <b>Low Nutrient Intake Categories (&lt;33<sup>rd</sup> percentile)<sup>3</sup></b> |                   |                    |                           |                    |                           |                    |                           |
| Water-soluble vitamins <sup>4</sup>                                                |                   | 1.08 [0.55 - 2.13] | 1.28 [0.64 - 2.57]        | 1.19 [0.6 - 2.35]  | 1.60 [0.79 - 3.24]        | 1.40 [0.71 - 2.79] | 1.07 [0.58 - 1.97]        |
| Fat-soluble vitamins <sup>4</sup>                                                  |                   | 1.33 [0.7 - 2.55]  | 1.68 [0.86 - 3.27]        | 1.18 [0.61 - 2.26] | <b>1.96 [1.01 - 3.82]</b> | 1.55 [0.81 - 2.95] | 1.34 [0.74 - 2.43]        |
| Minerals                                                                           |                   | 1.51 [0.8 - 2.85]  | <b>2.12 [1.07 - 4.20]</b> | 1.23 [0.65 - 2.32] | <b>2.07 [1.07 - 3.99]</b> | 1.68 [0.9 - 3.15]  | 1.49 [0.84 - 2.65]        |
| LCPUFAs                                                                            |                   | 1.03 [0.53 - 1.98] | 0.90 [0.45 - 1.80]        | 1.99 [0.98 - 4.04] | 1.42 [0.72 - 2.83]        | 1.38 [0.70 - 2.71] | 0.96 [0.53 - 1.75]        |

<sup>1</sup> Reference category for models of individual nutrient intake tertiles are levels between the 33<sup>rd</sup>-67<sup>th</sup> percentile of the sample distribution. Models adjusted for socioeconomic status (continuous), primiparity, maternal upper-arm circumference < 22 cm at enrollment, tobacco and/or betel nut use, season of initial antenatal assessment, and maternal educational attainment (years).

Analytic sample, n = 244 dyads with both nutrient and inflammatory marker data available

<sup>2</sup> Any marker refers to elevation (> 75<sup>th</sup> percentile) of one or more of the five inflammatory markers examined

<sup>3</sup> Low nutrient intake category variables are binary: operationalized as one or more deficiencies within nutrient category (at least one nutrient with value < 33<sup>rd</sup> percentile) versus no deficiencies (reference, no values less than 33<sup>rd</sup> percentile) within nutrient category

<sup>4</sup> Water-soluble vitamins include all Bs and C; Fat-soluble vitamins include A, D, and E

\*Statistically significant odds ratios (p < 0.05) are bolded
